# Supplementary material for: The Genetic Variation of Lactase Persistence Alleles in Sudan and South Sudan
Source: PubMed Central journal article supplement (PMC8175049; doi:10.1093/gbe/evab065), 2021-03-24
Supplement: evab065_supplementary_data.pdf [file evab065_supplementary_data.pdf]

## Supplementary Figures and Tables - The genetic variation of lactase persistence alleles in northeast Africa

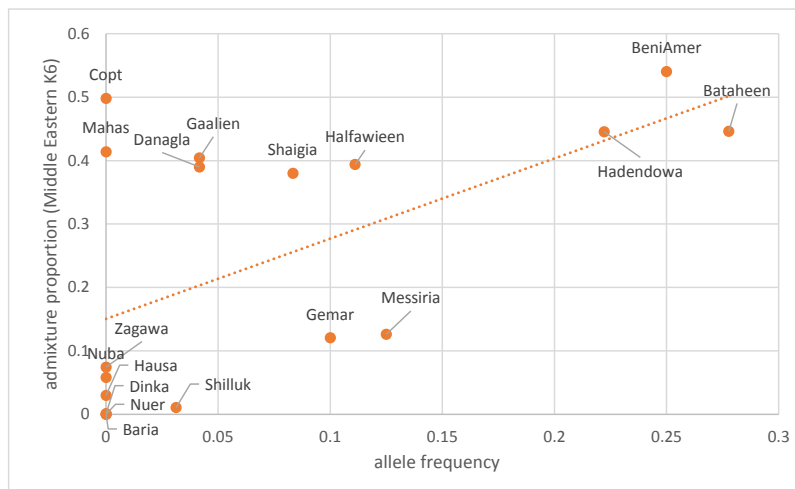

Figure S1: Comparison of allele frequency of -13915:G to the Middle Eastern ancestry component assuming 6 clusters in an ADMIXTURE analyses with worldwide populations [Hollfelder et al., 2017, Fig. S3].

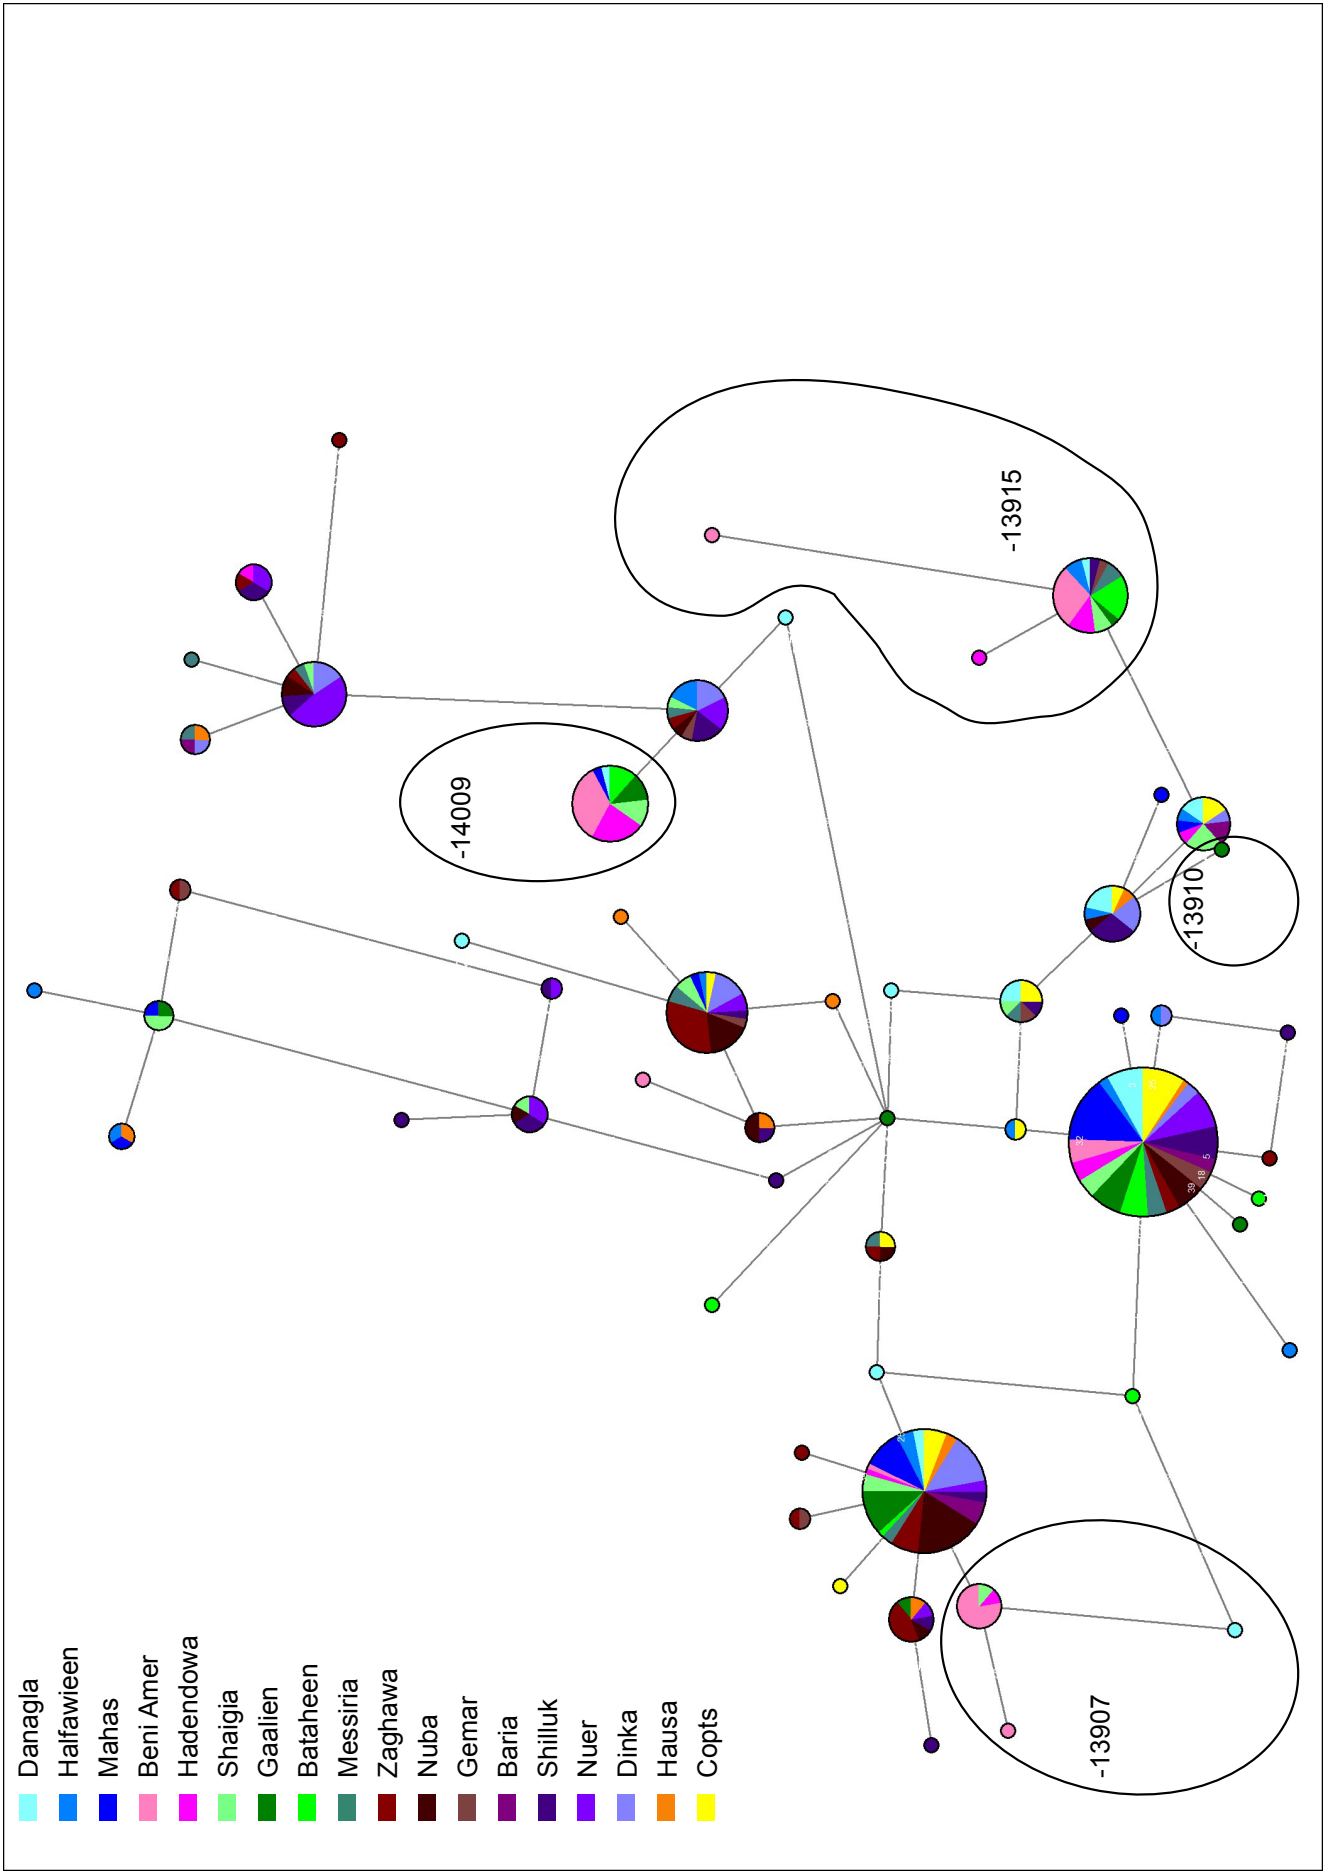

Figure S2: Haplotype network of polymorphic SNPs surrounding the Lactase SNPs, 10kb downstream and 20kb upstream.

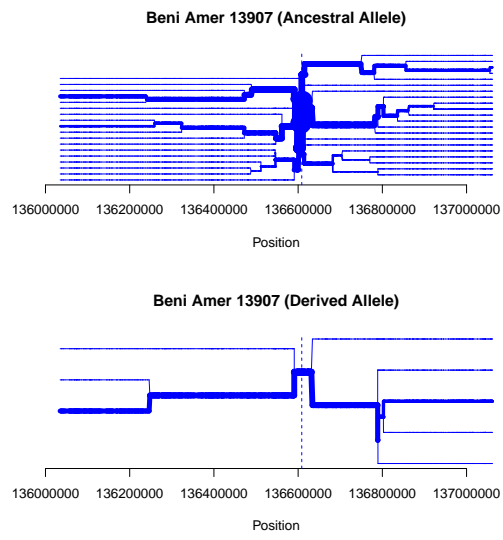

Figure S3: Haplotype structure around -13907

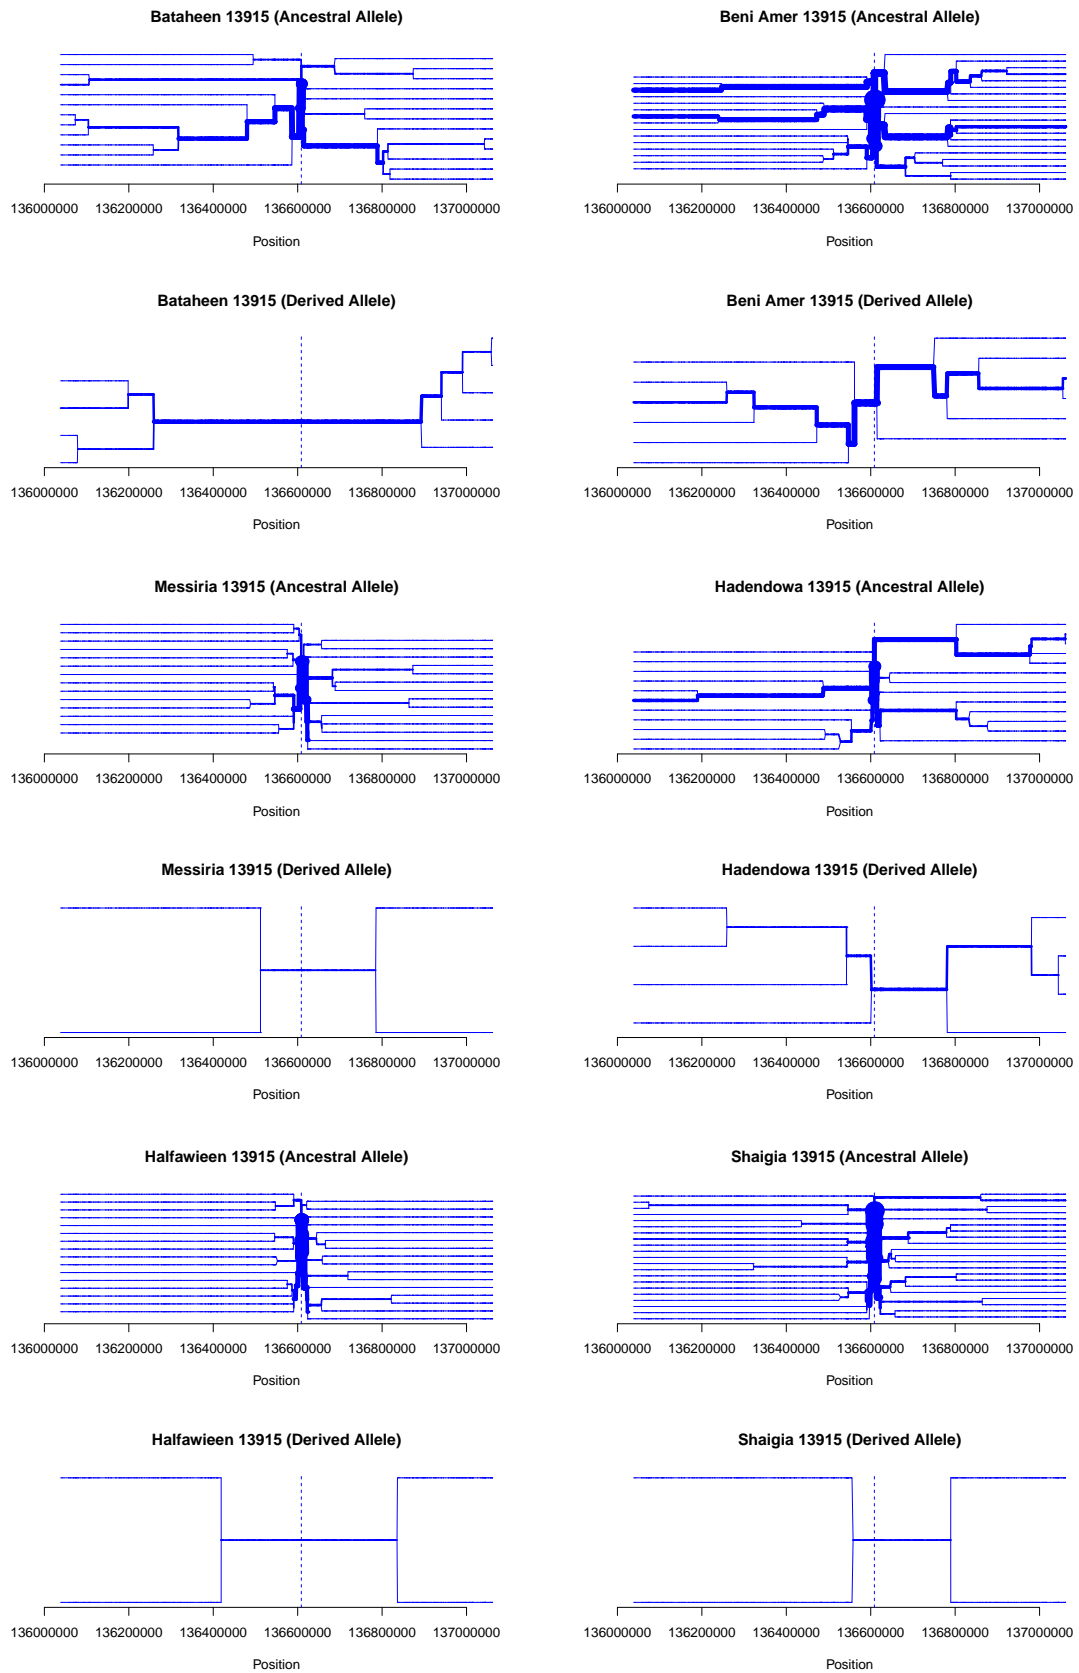

Figure S4: Haplotype structure around -13915

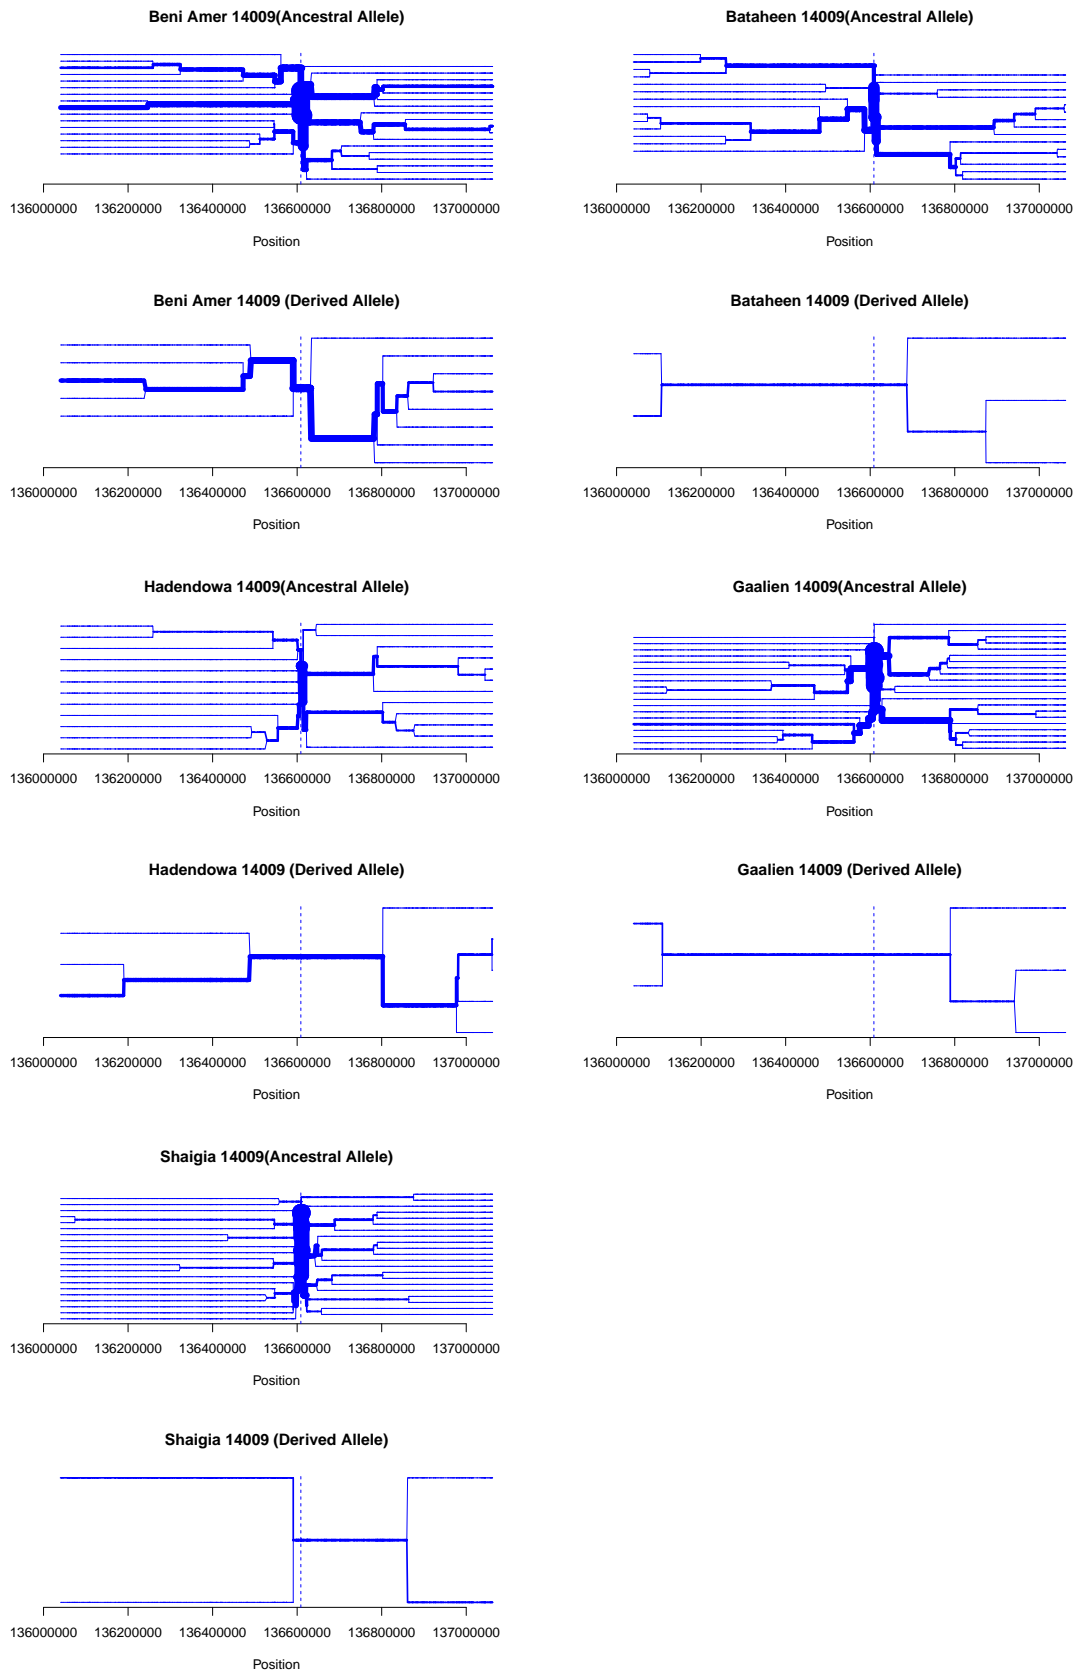

Figure S5: Haplotype structure around -14009.

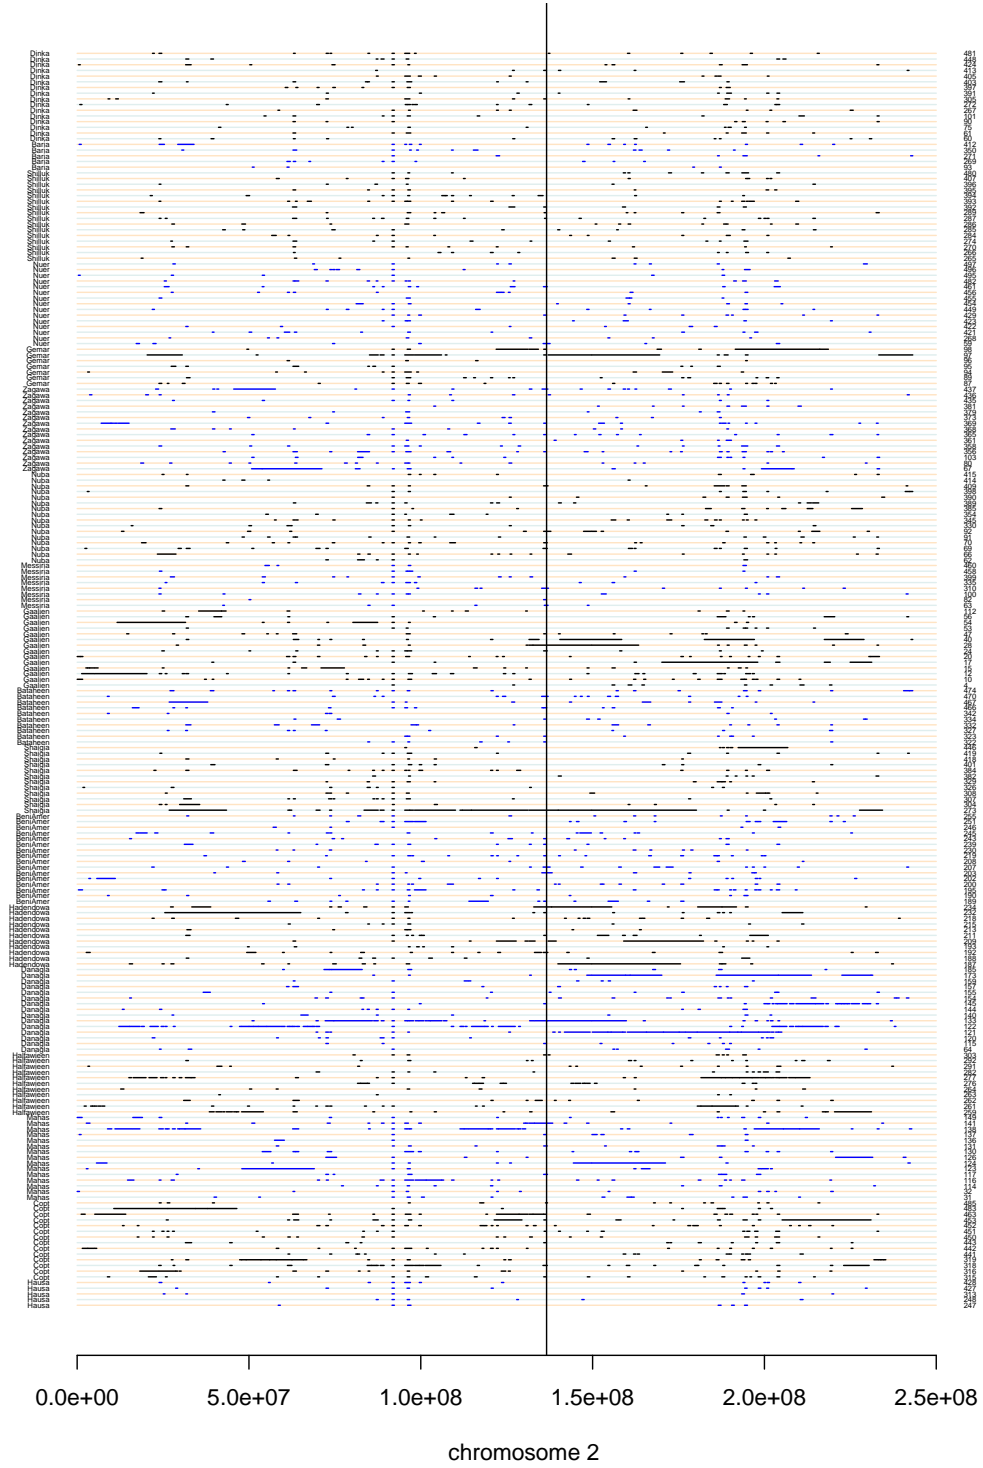

Figure S6: Runs of Homozygosity on chromosome 2. The X-axis shows the chromosomal position, the vertical black bar shows the position of 13910:C>T. The Y-axis on the left shows the population, the right the individual ID.

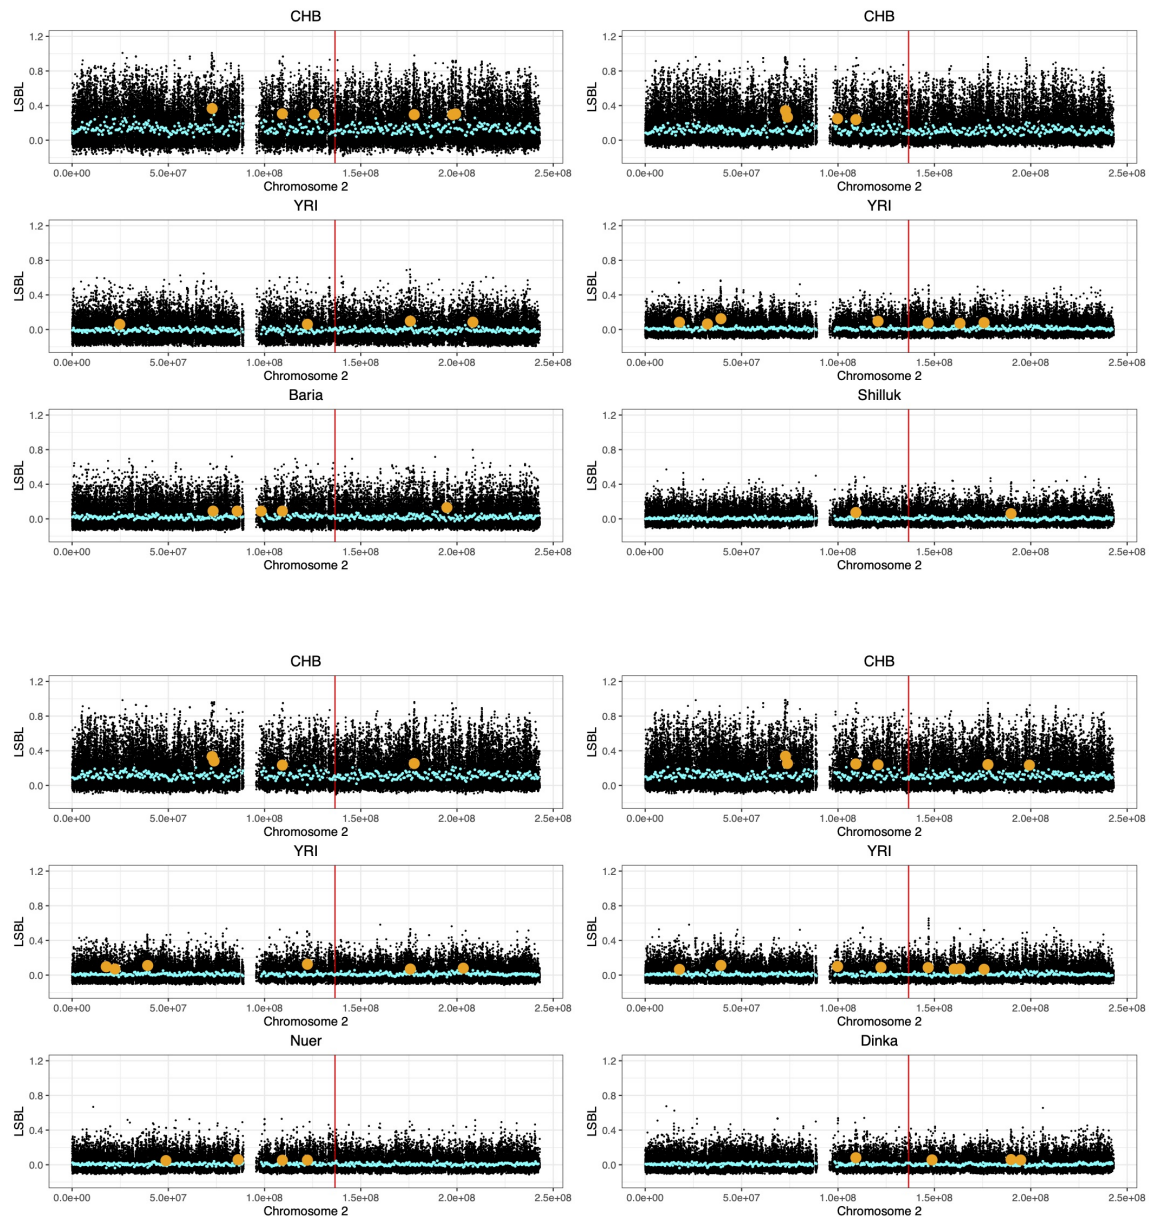

Figure S7: LSBL of the Nilotes. A group of three plots shows the population specific branch length for the combination CHB, YRI and X, where X is the population on the third plot of the group. The blue points indicate the means of 500kb windows, the larger orange points show windows that deviate from the mean by more than 3 standard deviations. The red vertical line shows the position of -13910:C>T.

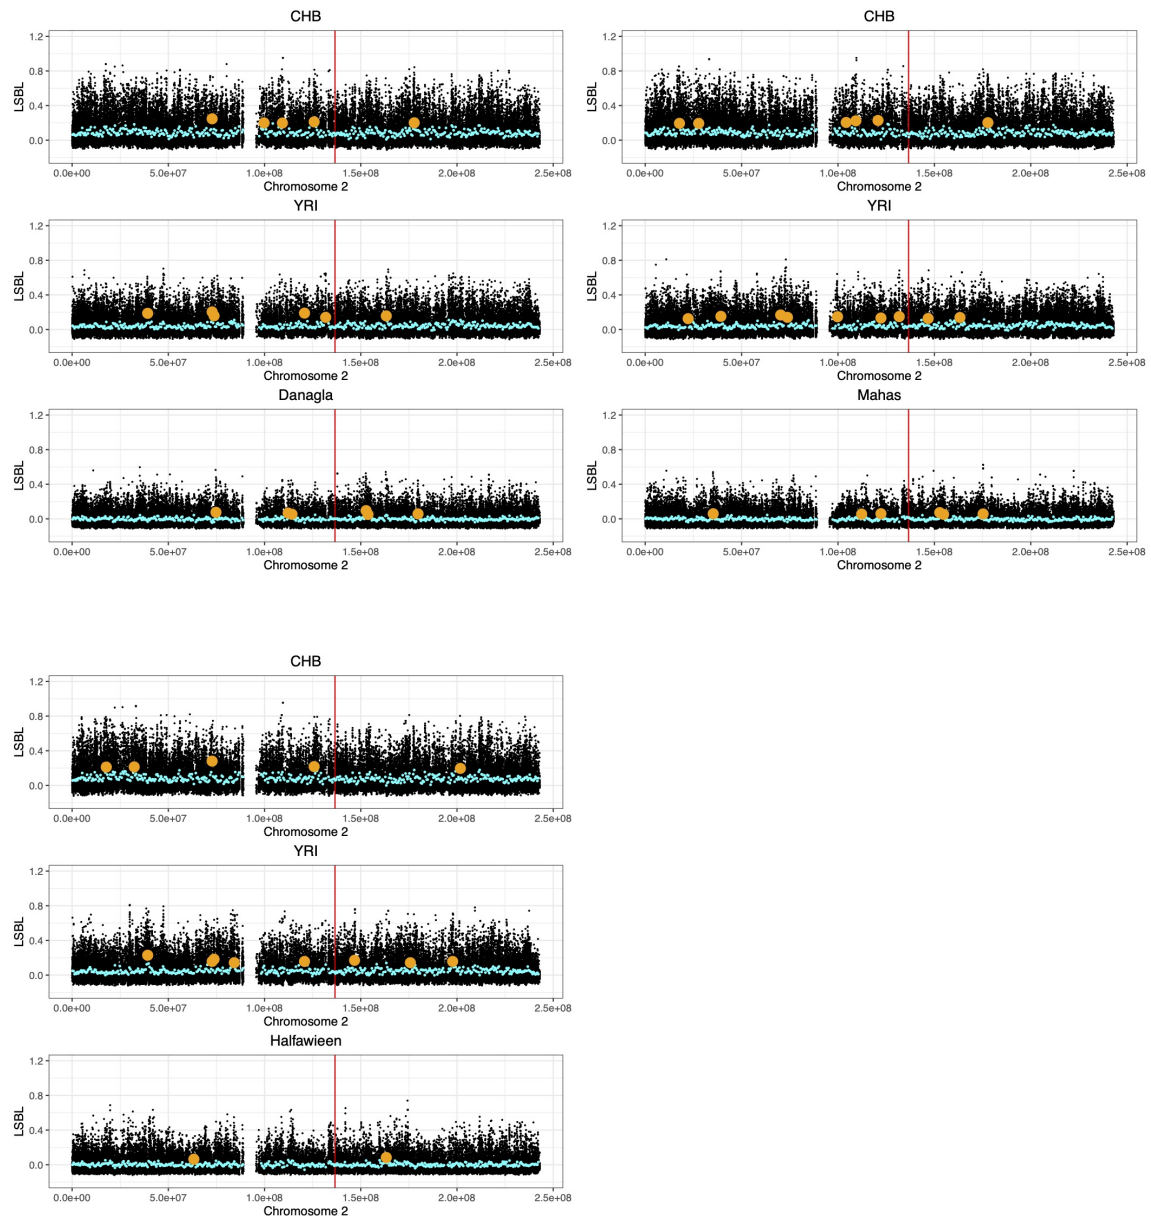

Figure S8: LSBL of the Nubians. A group of three plots shows the population specific branch length for the combination CHB, YRI and X, where X is the population on the third plot of the group. The blue points indicate the means of 500kb windows, the larger orange points show windows that deviate from the mean by more than 3 standard deviations. The red vertical line shows the position of 13910:C>T.



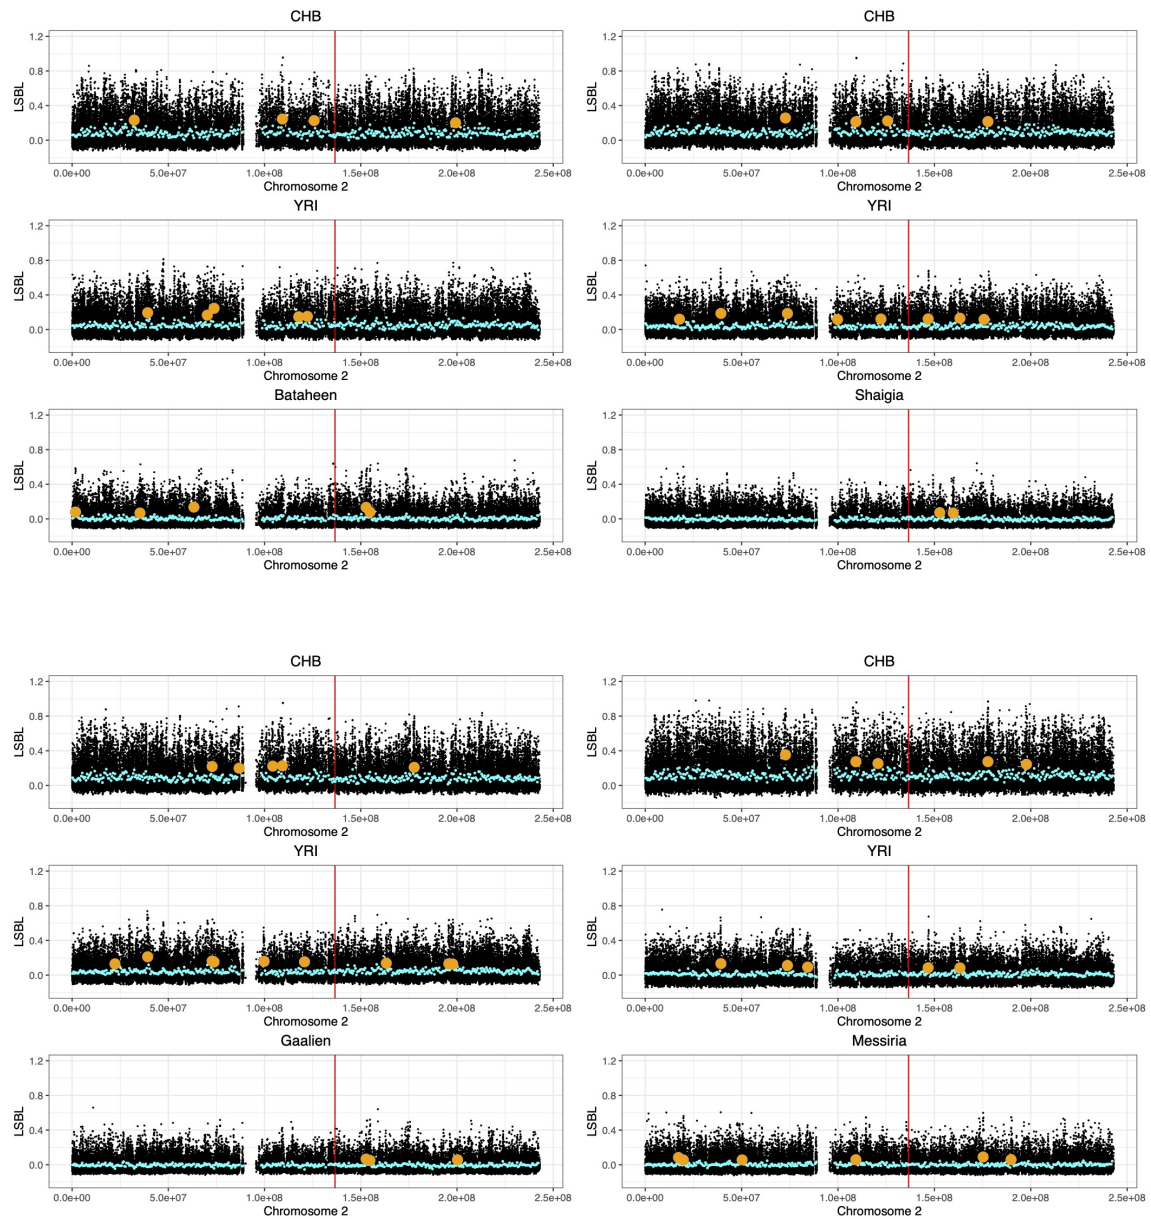

Figure S9: LSBL of the Arab populations. A group of three plots shows the population specific branch length for the combination CHB, YRI and X, where X is the population on the third plot of the group. The blue points indicate the means of 500kb windows, the larger orange points show windows that deviate from the mean by more than 3 standard deviations. The red vertical line shows the position of 13910:C>T.

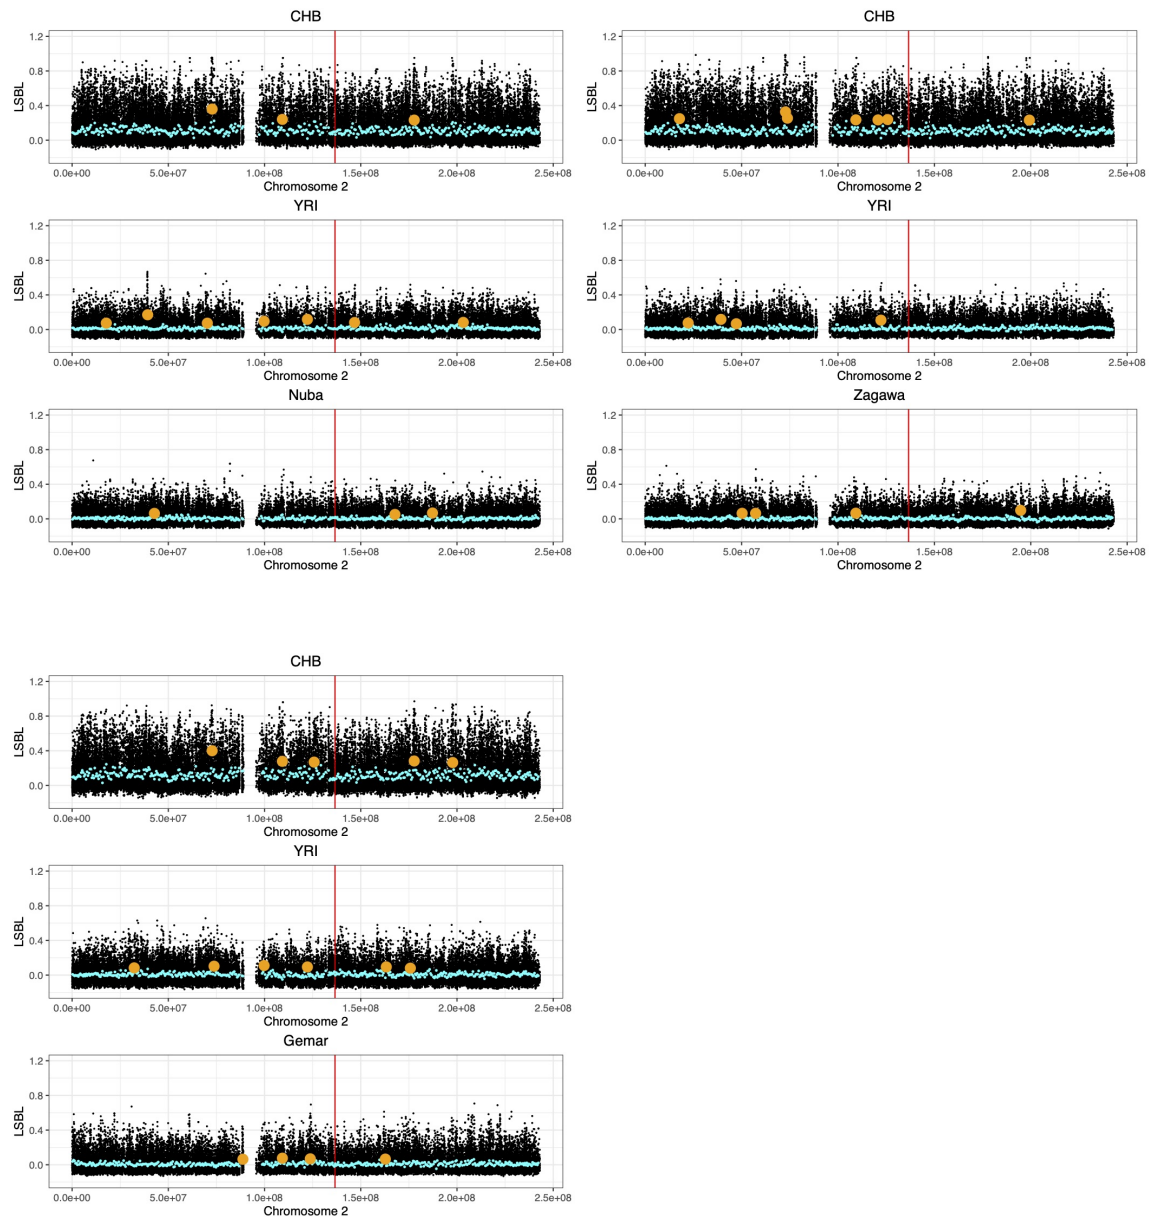

Figure S10: LSBL of the Darfurian/Kordofonanian populations. A group of three plots shows the population specific branch length for the combination CHB, YRI and X, where X is the population on the third plot of the group. The blue points indicate the means of 500kb windows, the larger orange points show windows that deviate from the mean by more than 3 standard deviations. The red vertical line shows the position of 13910:C>T.

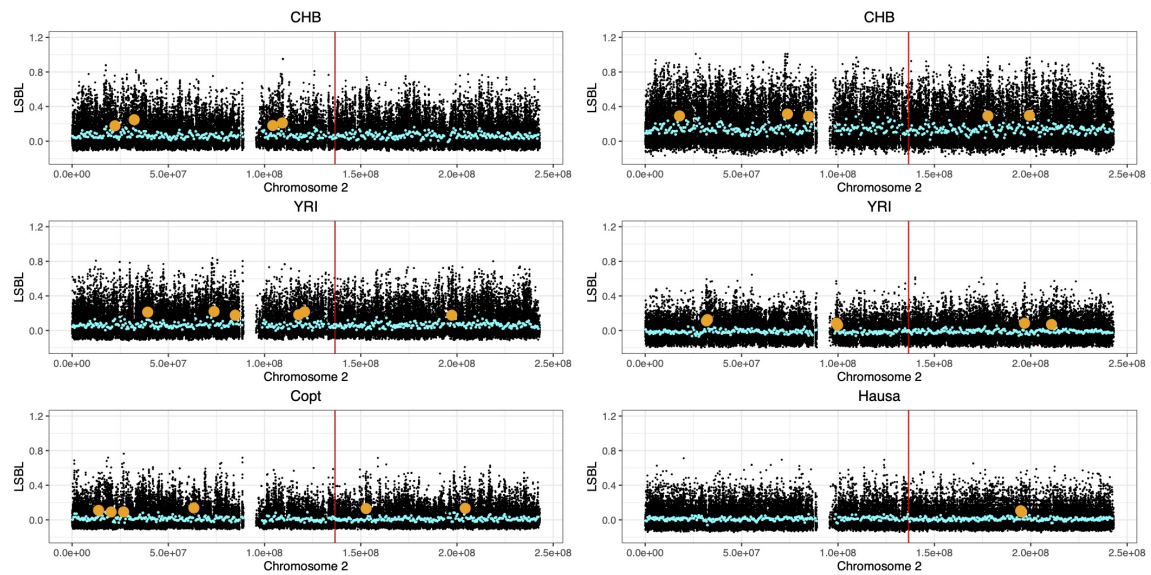

Figure S11: LSBL of the migrant populations. A group of three plots shows the population specific branch length for the combination CHB, YRI and X, where X is the population on the third plot of the group. The blue points indicate the means of 500kb windows, the larger orange points show windows that deviate from the mean by more than 3 standard deviations. The red vertical line shows the position of 13910:C>T.

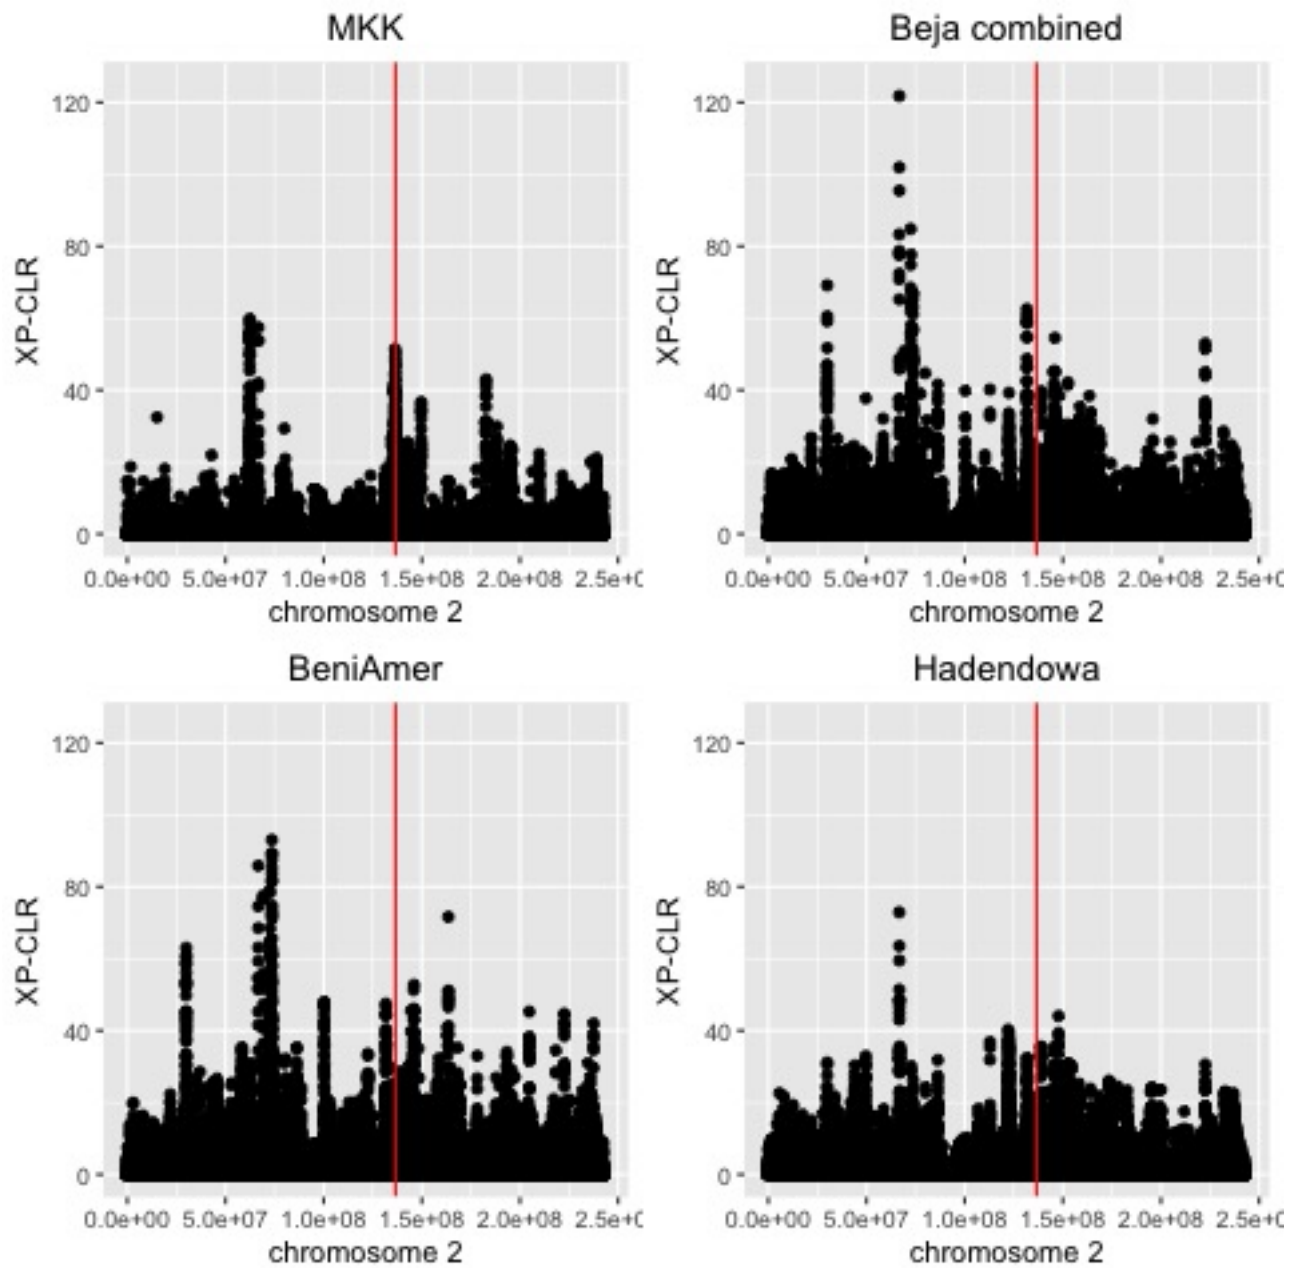

Figure S12: XP-CLR performed on MKK, BeniAmer, Hadendowa and both Beja populations combined using Dinka as reference. The red vertical line marks the position of -13910:C>T.

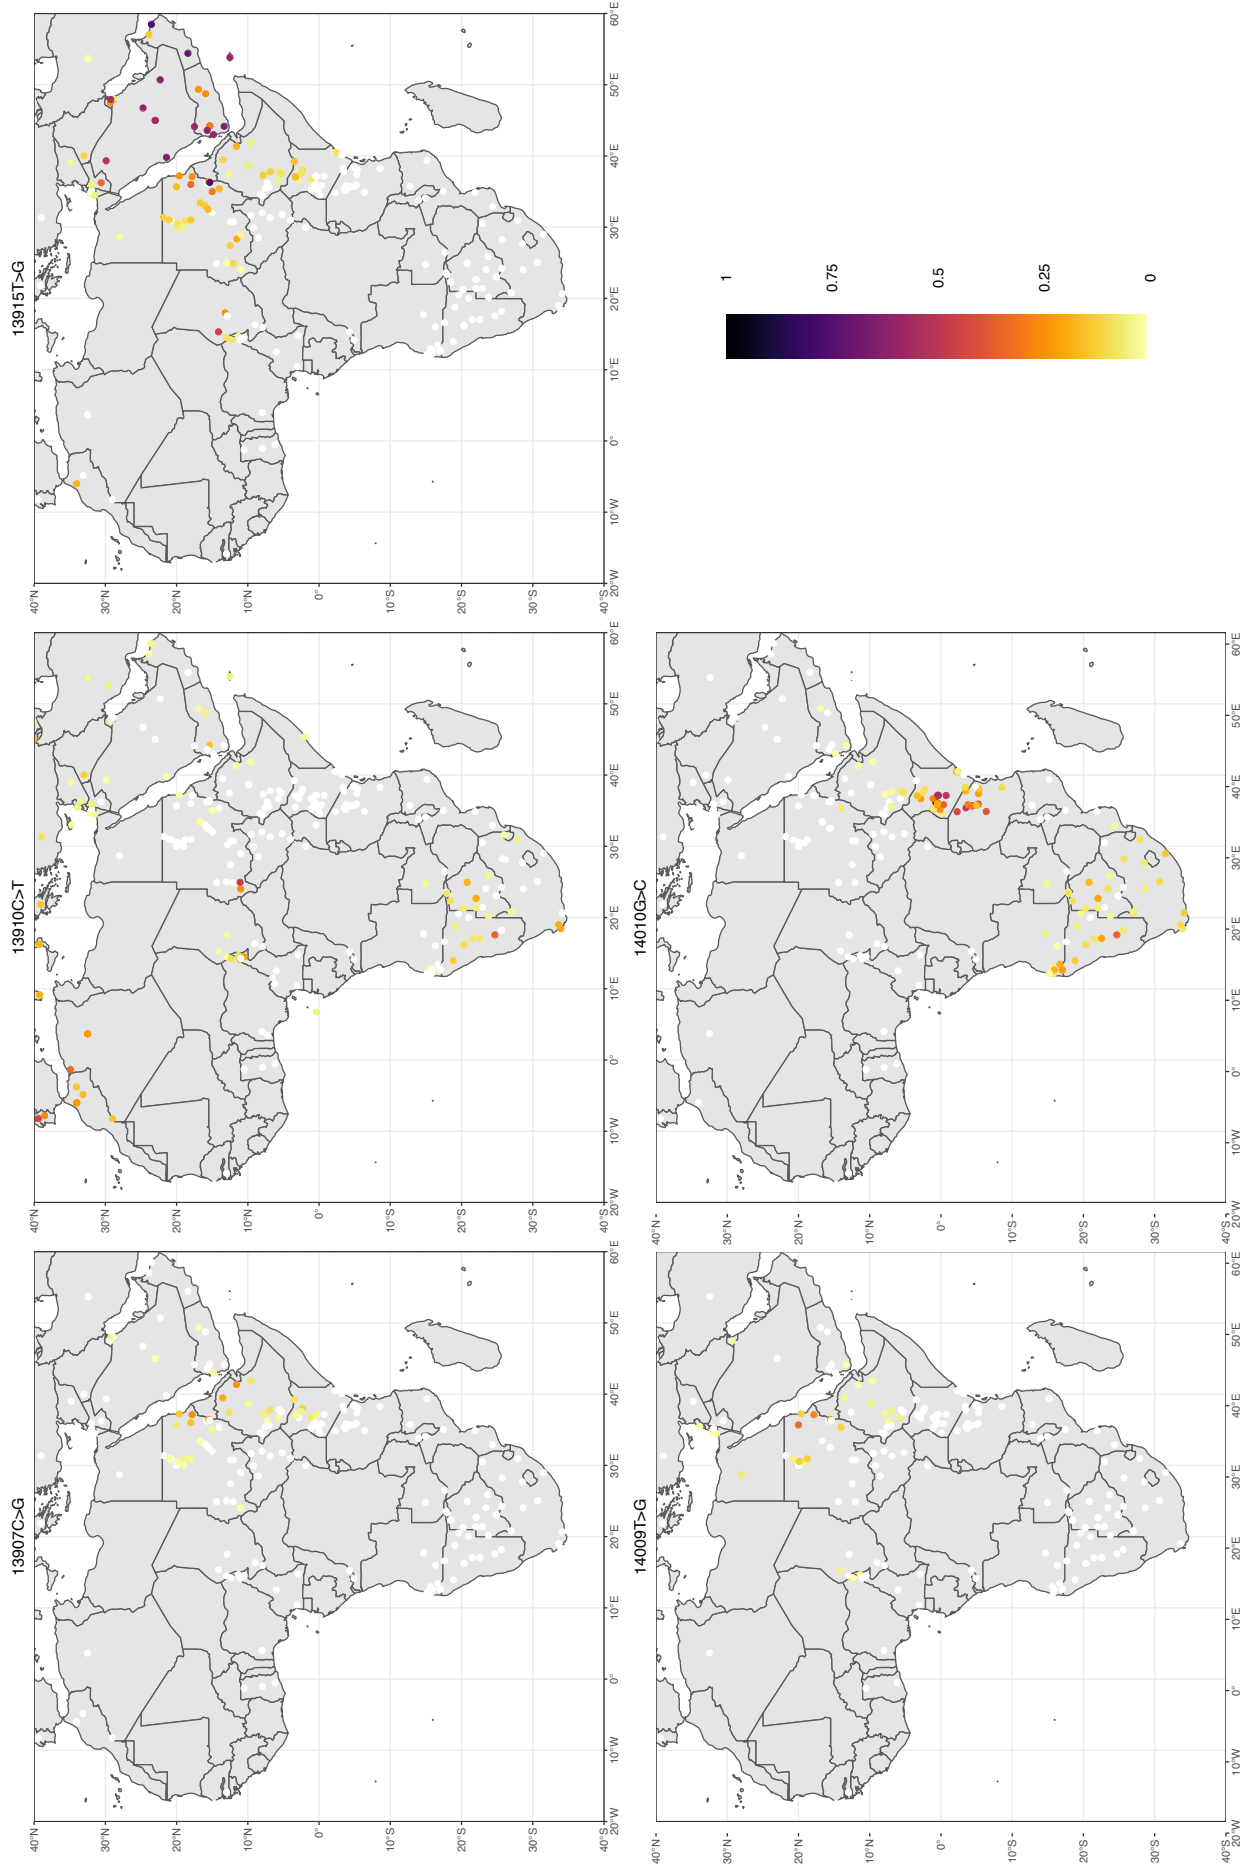

Figure S13: Allele frequency distribution of the derived alleles of the investigated SNPs in Africa. The white color signifies an allele frequency of zero. Data from this study and Liebert et al. [2017]

Table S1: Regions that have significantly long LSBL. Region that includes the LP-associated alleles is marked red.

| 500 kb window       | both $F_{ST}$ datasets                                                                     | neg. $F_{ST}$ allowed | neg. $F_{ST}$ converted to 0 |
|---------------------|--------------------------------------------------------------------------------------------|-----------------------|------------------------------|
| 1518677-2018677     | Bataheen                                                                                   |                       |                              |
| 13518701-14018701   | CEU, Copt                                                                                  |                       |                              |
| 17018708-17518708   | Beni Amer,<br>Hadendowa,<br>Messiria                                                       |                       |                              |
| 19518713-20018713   | Messiria                                                                                   |                       |                              |
| 20018714-20518714   | Copt                                                                                       |                       |                              |
| 26518727-27018727   | Copt                                                                                       |                       |                              |
| 35018744-35518744   | Bataheen, Mahas                                                                            |                       |                              |
| 42518759-43018759   | MKK, Nuba                                                                                  |                       |                              |
| 44518763-45018763   | Hadendowa                                                                                  |                       |                              |
| 48518771-49018771   |                                                                                            | Nuer, MKK             |                              |
| 50018774-50518774   | Zaghawa                                                                                    | Messiria              |                              |
| 57018788-57518788   | Zaghawa                                                                                    |                       |                              |
| 63018800-63518800   | Bataheen,<br>Copt,<br>Hadendowa,<br>Halfawieen                                             |                       |                              |
| 73018820-73518820   | Baria                                                                                      |                       |                              |
| 74518823-75018823   | CEU, Danagla                                                                               |                       |                              |
| 84518843-85018843   |                                                                                            |                       | Shilluk                      |
| 85518845-86018845   | Baria                                                                                      |                       |                              |
| 86018846-86518846   | Nuer                                                                                       |                       |                              |
| 88518851-89018851   |                                                                                            |                       | Gemar                        |
| 98018870-98518870   | Baria, MKK                                                                                 |                       |                              |
| 108018890-108518890 | CEU                                                                                        |                       |                              |
| 109018892-109518892 | Dinka, Gemar,<br>Messiria, Nuer,<br>Shilluk, Zaghawa                                       | Baria                 |                              |
| 112018898-112518898 | Danagla, Mahas                                                                             |                       |                              |
| 114018902-114518902 | Danagla                                                                                    |                       |                              |
| 122018918-122518918 | CEU,<br>Hadendowa,<br>Mahas, Nuer                                                          |                       |                              |
| 123518921-124018921 | Gemar                                                                                      |                       |                              |
| 135018944-135518944 | MKK                                                                                        |                       |                              |
| 136018946-136518946 | Hadendowa                                                                                  |                       |                              |
| 136518947-137018947 | CEU, MKK                                                                                   |                       |                              |
| 137018948-137518948 | Beni Amer                                                                                  |                       |                              |
| 137518949-138018949 | MKK                                                                                        |                       |                              |
| 148518971-149018971 | Dinka                                                                                      |                       |                              |
| 152518979-153018979 | Bataheen,<br>Beni Amer,<br>CEU, Copt,<br>Danagla, Gaalien,<br>Hadendowa,<br>Mahas, Shaigia |                       |                              |
| 154518983-155018983 | Bataheen,<br>Gaalien, Mahas                                                                |                       | Hadendowa                    |
| 159518993-160018993 | Shaigia                                                                                    |                       |                              |
| 162518999-163018999 | Gemar                                                                                      |                       |                              |
| 163019000-163519000 | Beni Amer ,<br>CEU, Halfawieen                                                             |                       |                              |
| 167519009-168019009 | Nuba                                                                                       |                       |                              |
| 175019024-175519024 | Mahas, Messiria                                                                            |                       |                              |
| 179519033-180019033 | Danagla                                                                                    |                       |                              |
| 187019048-187519048 | Nuba                                                                                       |                       |                              |
| 189519053-190019053 | Dinka,<br>Messiria,<br>Shilluk                                                             |                       |                              |
| 194519063-195019063 | Baria, Dinka,<br>Hausa,<br>Zaghawa                                                         |                       |                              |
| 195019064-195519064 | Hausa                                                                                      |                       |                              |
| 196019066-196519066 | CEU                                                                                        |                       |                              |
| 200019074-200519074 | Beni Amer,<br>Gaalien                                                                      |                       |                              |
| 204019082-204519082 | Beni Amer,<br>Copt                                                                         |                       |                              |

There are two regions that are distinguished in more than four populations. The first region (2:152518979-153018979) harbors the following genes: *NEB*, *ARL5A*, *CACNB4*, and *STAM2*. These Genes are associated with: nemaline myopathy 2, anxiety disorders, pancreatitis, waist circumference, lung neoplasms, altruism, body height, epilepsy, alopecia, hemoglobins, alcoholism, and chemo-therapy induced alopecia in breast cancer patients. The second region (2:109018892-109518892) contains the genes *GCC2* associated with child development disorders, *LIMS1*, *CCDC138*, and *RANBP2* which is associated with susceptibility to encephalopathy, and is downstream of *EDAR*, which is associated with hair and tooth morphology and ectodermal dysplasia.

## References

- N. Hollfelder, C. M. Schlebusch, T. Gu, H. Babiker, H. Y. Hassan, and M. Jakobsson. Northeast African genomic variation shaped by the continuity of indigenous groups and Eurasian migrations. *PLoS Genetics*, 13(8):1–17, 8 2017. ISSN 1553-7404. doi: 10.5061/dryad.bs06h. URL <http://dx.plos.org/10.1371/journal.pgen.1006976>.
- A. Liebert, S. López, B. L. Jones, N. Montalva, P. Gerbault, W. Lau, M. G. Thomas, N. Bradman, N. Maniatis, and D. M. Swallow. World-wide distributions of lactase persistence alleles and the complex effects of recombination and selection. *Human Genetics*, 136(11-12):1445–1453, 11 2017. ISSN 0340-6717. doi: 10.1007/s00439-017-1847-y. URL <http://link.springer.com/10.1007/s00439-017-1847-y>.
